# Supplementary material for: Preparation and Characterization of Mg-Doped Calcium Phosphate-Coated Phycocyanin Nanoparticles for Improving the Thermal Stability of Phycocyanin
Source: MDPI journal article supplement (doi:10.3390/foods11040503), 2022-02-10
Supplement: s1 [file s1]

# Supplementary Information

## Preparation and Characterization of Mg-Doped Calcium Phosphate-Coated Phycocyanin Nanoparticles for Improving the Thermal Stability Of Phycocyanin

Qian Li <sup>1</sup>, Ping Dong <sup>1\*</sup>, Laihao Li <sup>2\*</sup>

<sup>1</sup> College of Food Science and Engineering, Ocean University of China, Qingdao 266003, China

<sup>2</sup> Key Laboratory of Aquatic Product Processing, Ministry of Agriculture and Rural Affairs, National R&D Center for Aquatic Product Processing, South China Sea Fisheries Research Institute, Chinese Academy of Fishery Sciences, Guangzhou 510300, China

**Table S1.** Elements proportion of PC@Mg-CaP (Ca/P = 5) sample surface

| Element | Weight% | Weight% $\sigma$ | Atomic % |
|---------|---------|------------------|----------|
| N       | 6.98    | 0.61             | 8.98     |
| O       | 69.95   | 0.47             | 78.72    |
| Mg      | 2.92    | 0.05             | 2.16     |
| P       | 8.28    | 0.08             | 4.81     |
| Ca      | 11.87   | 0.11             | 5.33     |
| Total   | 100.00  |                  | 100.00   |

**Table S2.** Elements proportion of CaP sample surface

| Element | Weight% | Weight% $\sigma$ | Atomic % |
|---------|---------|------------------|----------|
| O       | 83.68   | 0.21             | 91.64    |
| Mg      | 1.59    | 0.02             | 1.15     |
| P       | 6.03    | 0.03             | 3.41     |
| Ca      | 8.70    | 0.04             | 3.80     |
| Total   | 100.00  |                  | 100.00   |

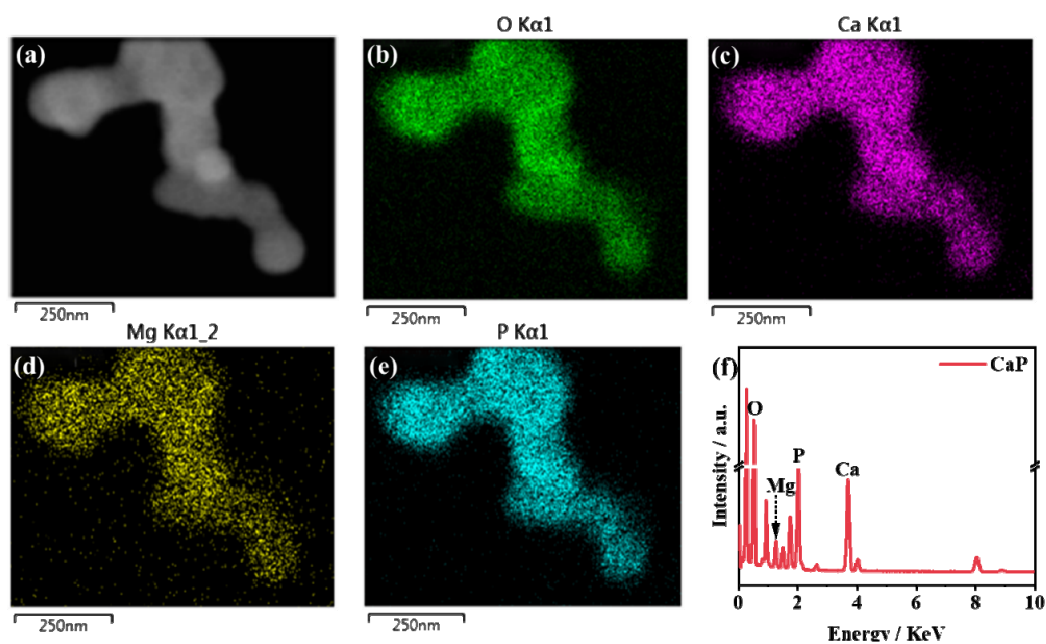

**Figure S1.** Surface element mapping (a-e) and energy spectrum analysis (f) of CaP.

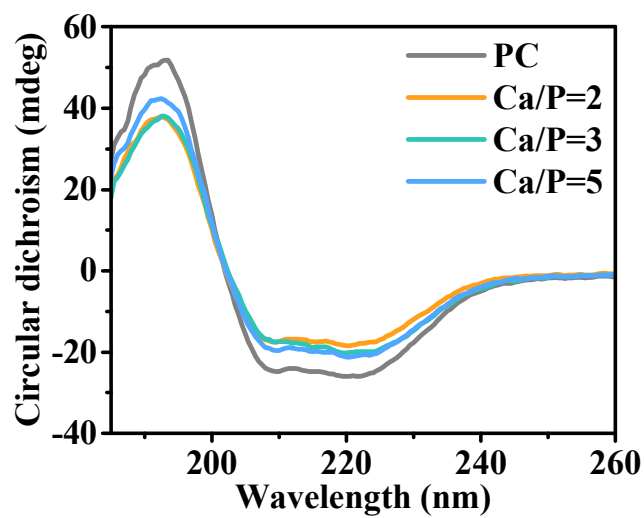

**Figure S2.** UV-circular dichroism spectrum of PC and PC@Mg-CaP.
